# Supplementary material
Source: Springer Nature journal article supplement (https://www.springerprofessional.de/resource/supplementary/13638_2010_119_MOESM7_ESM.pdf/11897082)

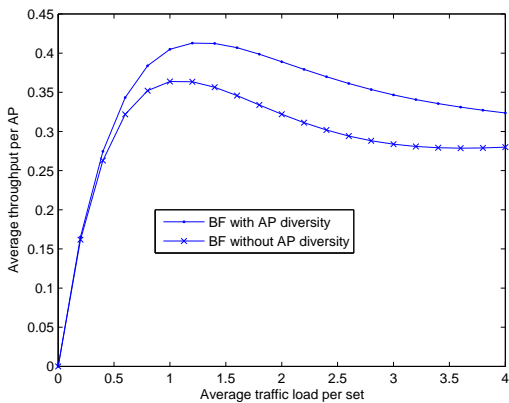

$[N_A = 45, N_B = 5.]$

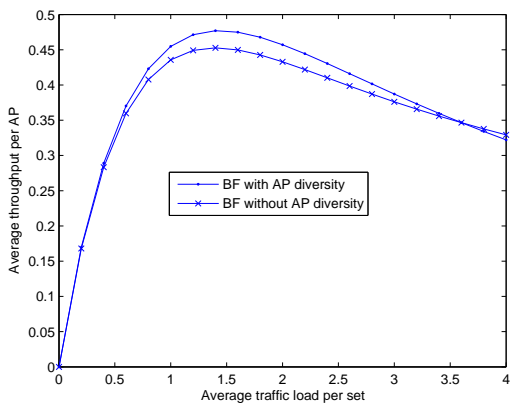

$[N_A = 40, N_B = 10.]$

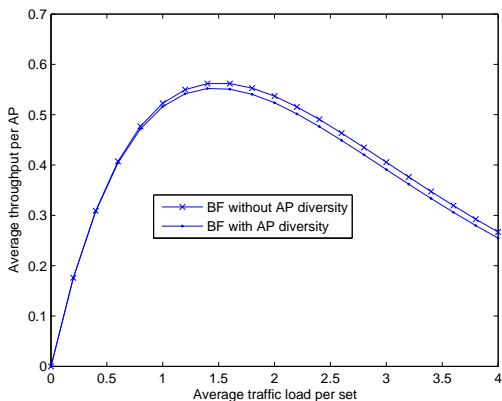

$[N_A = 25, N_B = 25.]$

Supplement: MOESM7 [file 11897082]
